# Supplementary material
Source: publisher figshare collection journal article supplement (https://geolsoc.figshare.com/articles/dataset/_/3454733)

Electronic appendix 4  
Rb-Sr 5-point isochron diagrams for separated phlogopite

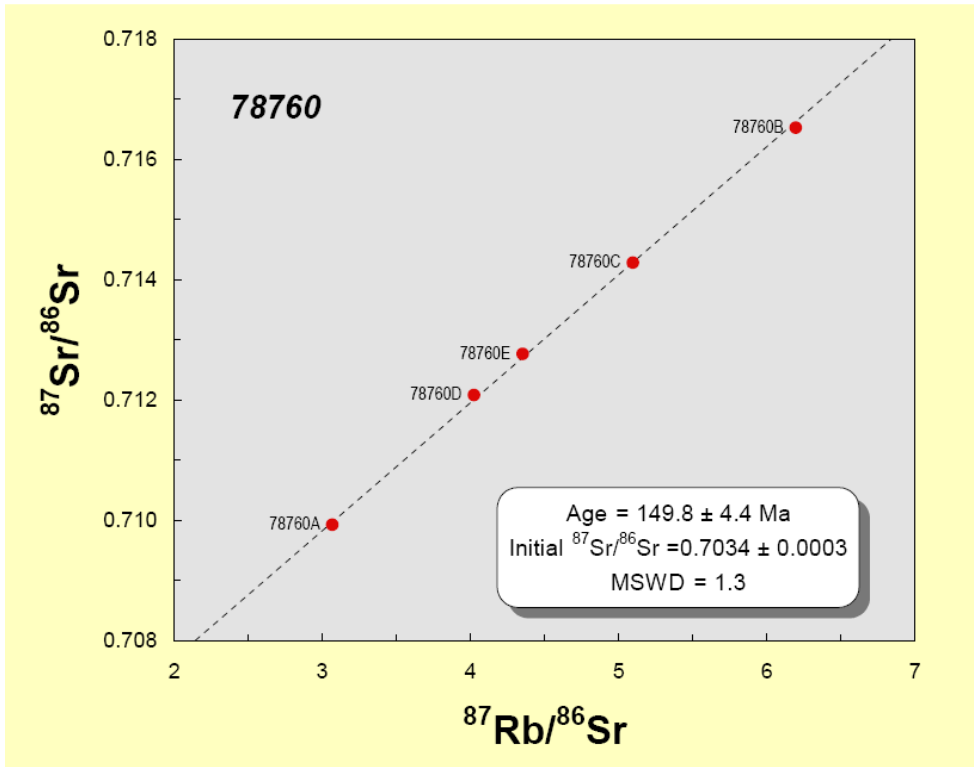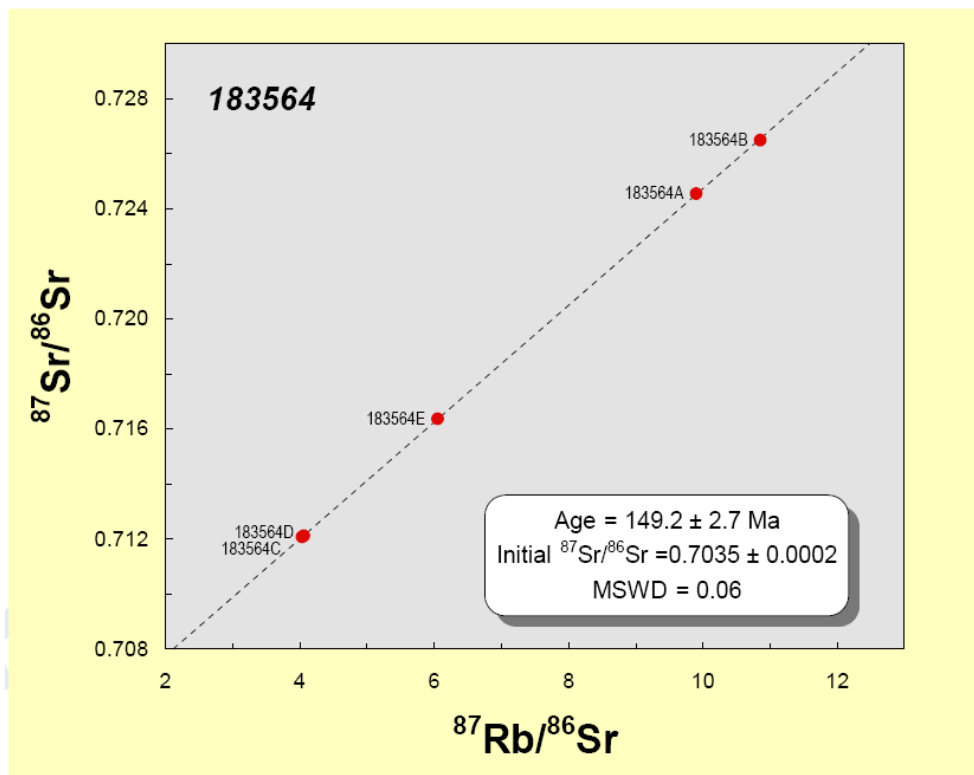

# Rb-Sr 2-point isochron diagram for separated phlogopite and bulk rock

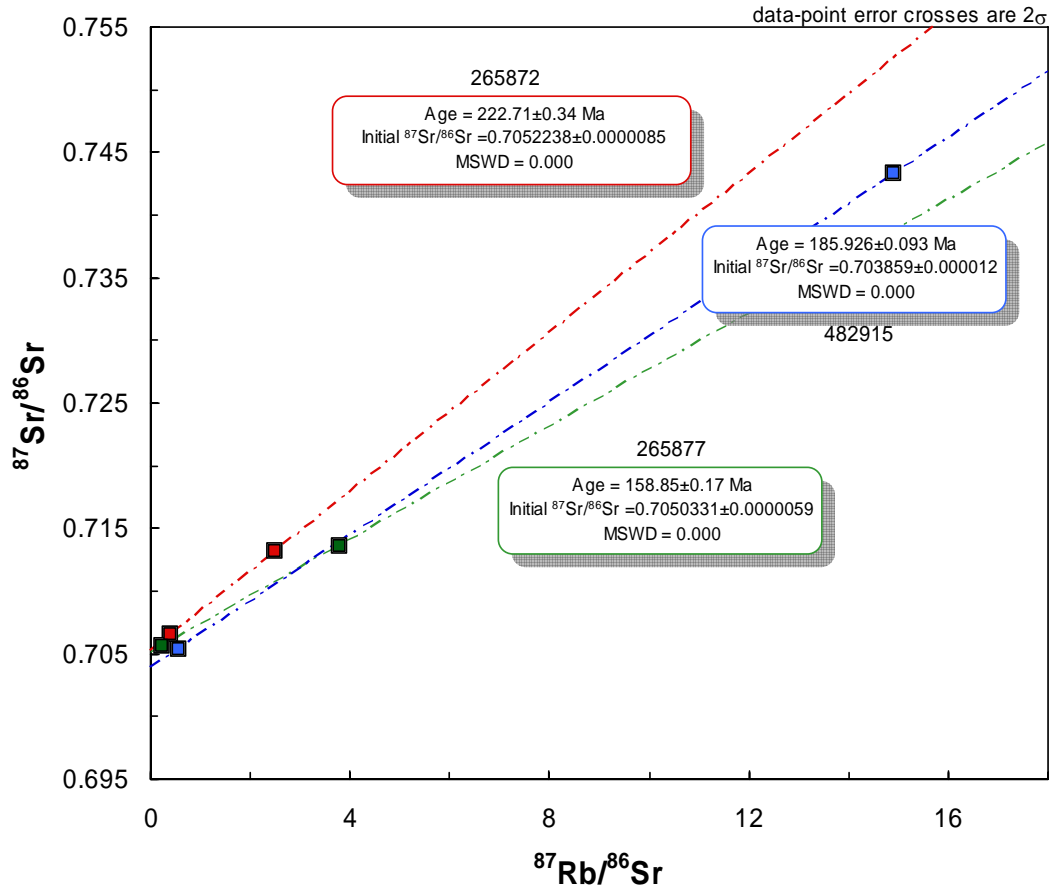

Supplement: Supplementary file 1 [file 1]
