# Supplementary material
Source: publisher figshare collection journal article supplement (https://geolsoc.figshare.com/articles/dataset/_/3454733)
Supplement: Supplementary file 2 [file 1]

# Electronic Appendix 3: $^{40}\text{Ar}/^{39}\text{Ar}$ plateau, normal and inverse isochron diagrams

05C3326.AGE >>> 318802 >>> LARSEN PROJECT

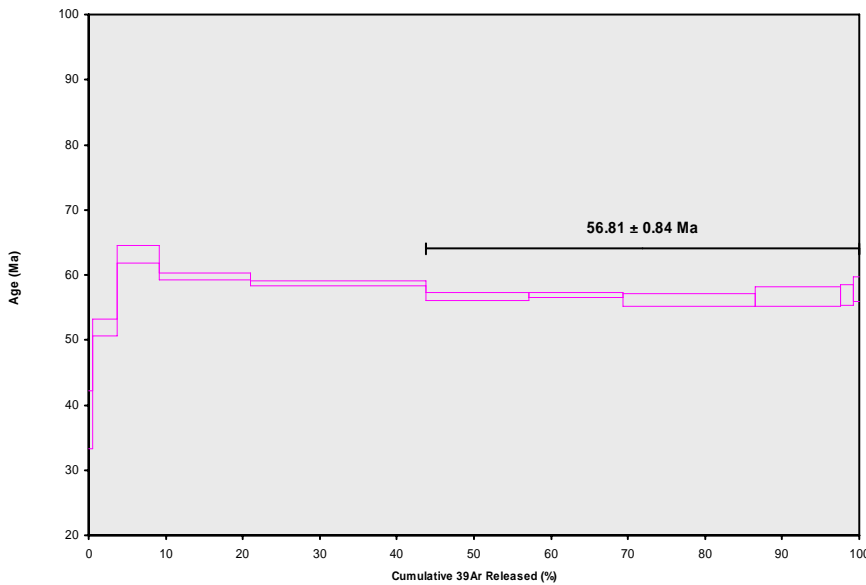

**Ar-Ages in Ma**

WEIGHTED PLATEAU  
56.81 ± 0.84  
TOTAL FUSION  
57.57 ± 0.85  
NORMAL ISOCHRON  
56.79 ± 0.88  
INVERSE ISOCHRON  
56.79 ± 0.88

MSWD  
0.66

**Sample Info**

whole rock  
Greenland  
jh

IRR = OSU5D05  
J = 0.0015618 ± 0.0000109

05C3326.AGE >>> 318802 >>> LARSEN PROJECT

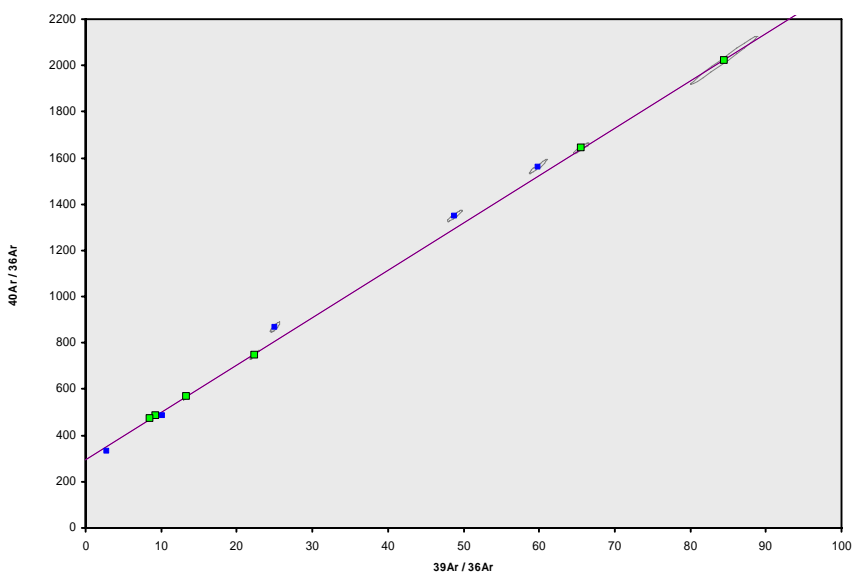

**Ar-Ages in Ma**

WEIGHTED PLATEAU  
56.81 ± 0.84  
TOTAL FUSION  
57.57 ± 0.85  
NORMAL ISOCHRON  
56.79 ± 0.88  
INVERSE ISOCHRON  
56.79 ± 0.88

MSWD  
0.83

40AR/36AR INTERCEPT  
295.9 ± 4.2

**Sample Info**

whole rock  
Greenland  
jh

IRR = OSU5D05  
J = 0.0015618 ± 0.0000109

05C3326.AGE >>> 318802 >>> LARSEN PROJECT

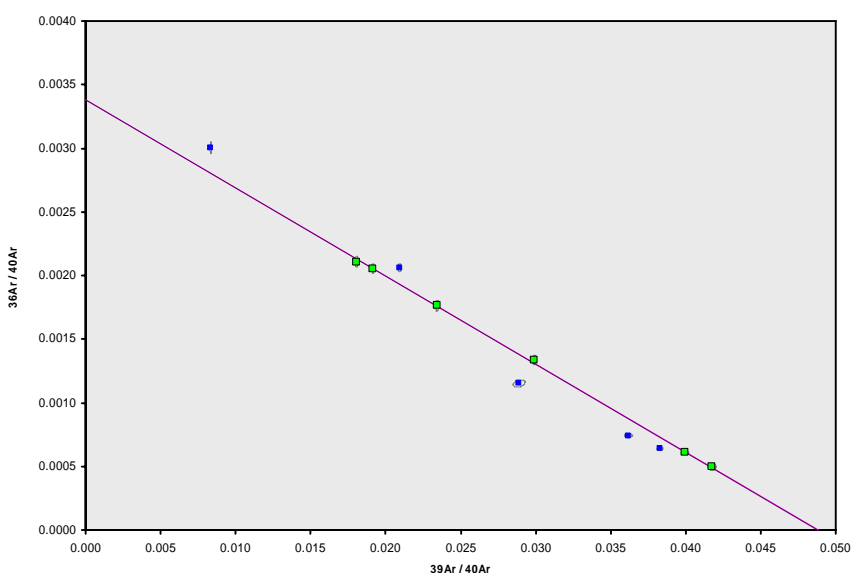

**Ar-Ages in Ma**

WEIGHTED PLATEAU  
56.81 ± 0.84  
TOTAL FUSION  
57.57 ± 0.85  
NORMAL ISOCHRON  
56.79 ± 0.88  
INVERSE ISOCHRON  
56.79 ± 0.88

MSWD  
0.82

40AR/36AR INTERCEPT  
295.9 ± 4.2

**Sample Info**

whole rock  
Greenland  
jh

IRR = OSU5D05  
J = 0.0015618 ± 0.0000109

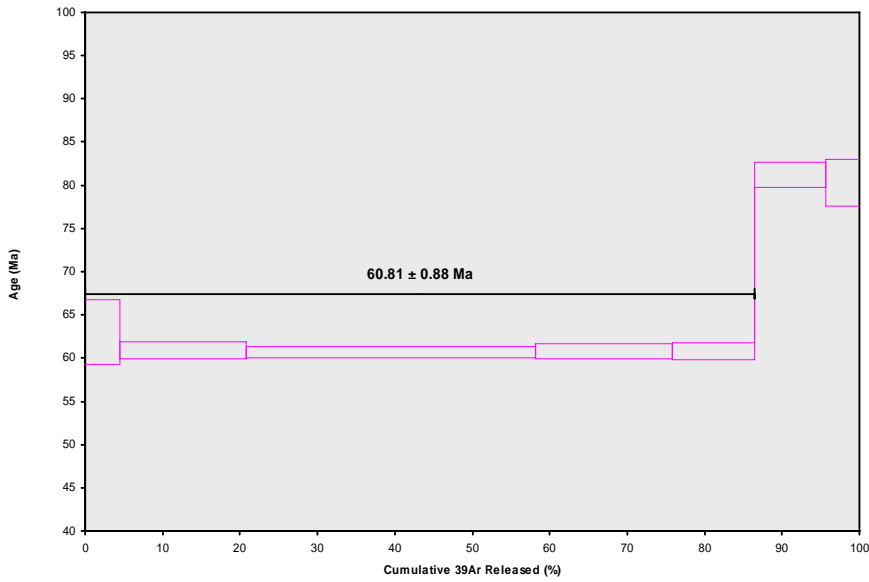

**Ar-Ages in Ma**

WEIGHTED PLATEAU  
60.81 ± 0.88  
TOTAL FUSION  
63.62 ± 0.92  
NORMAL ISOCHRON  
60.55 ± 0.99  
INVERSE ISOCHRON  
60.55 ± 0.99

MSWD  
0.38

**Sample Info**

plagioclase  
Greenland  
jh

IRR = OSU4A05  
J = 0.0015022 ± 0.0000098

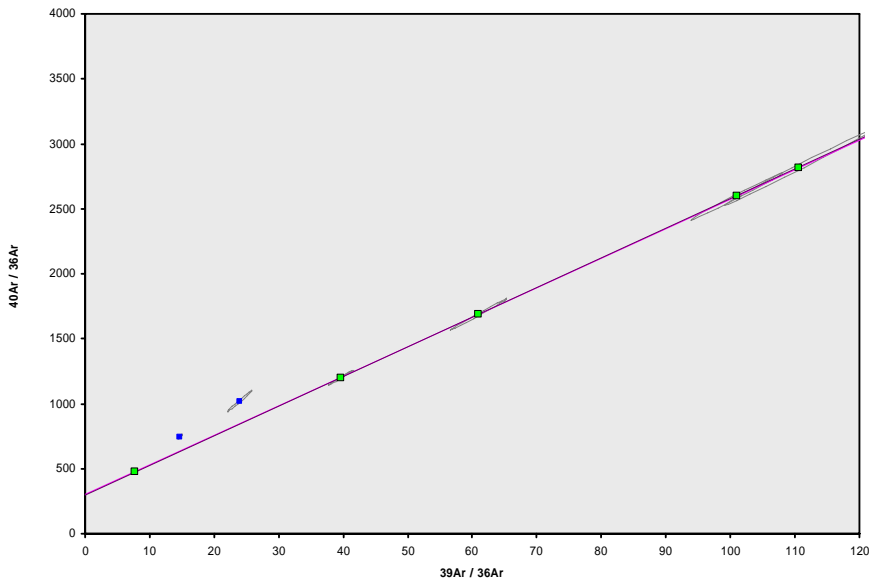

**Ar-Ages in Ma**

WEIGHTED PLATEAU  
60.81 ± 0.88  
TOTAL FUSION  
63.62 ± 0.92  
NORMAL ISOCHRON  
60.55 ± 0.99  
INVERSE ISOCHRON  
60.55 ± 0.99

MSWD  
0.04

40AR/36AR INTERCEPT  
302.2 ± 11.5

**Sample Info**

plagioclase  
Greenland  
jh

IRR = OSU4A05  
J = 0.0015022 ± 0.0000098

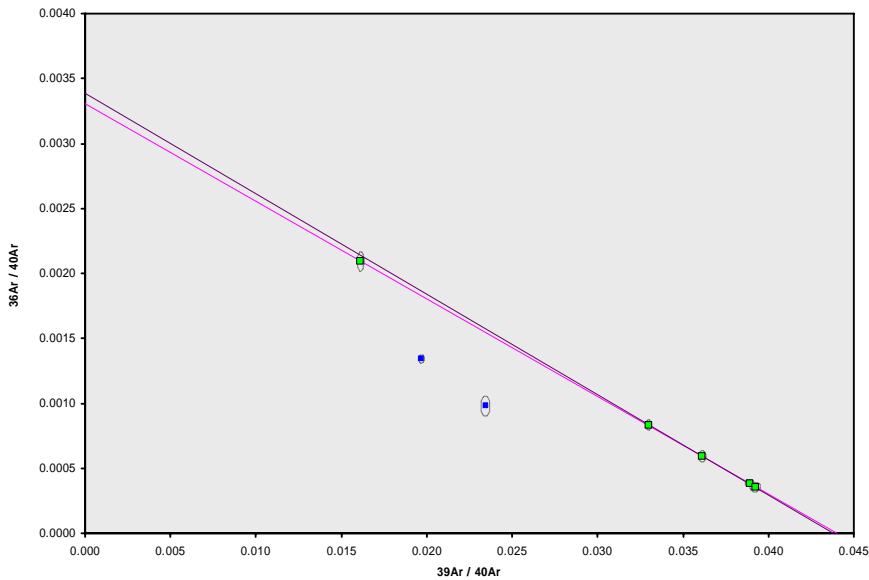

**Ar-Ages in Ma**

WEIGHTED PLATEAU  
60.81 ± 0.88  
TOTAL FUSION  
63.62 ± 0.92  
NORMAL ISOCHRON  
60.55 ± 0.99  
INVERSE ISOCHRON  
60.55 ± 0.99

MSWD  
0.04

40AR/36AR INTERCEPT  
302.2 ± 11.5

**Sample Info**

plagioclase  
Greenland  
jh

IRR = OSU4A05  
J = 0.0015022 ± 0.0000098

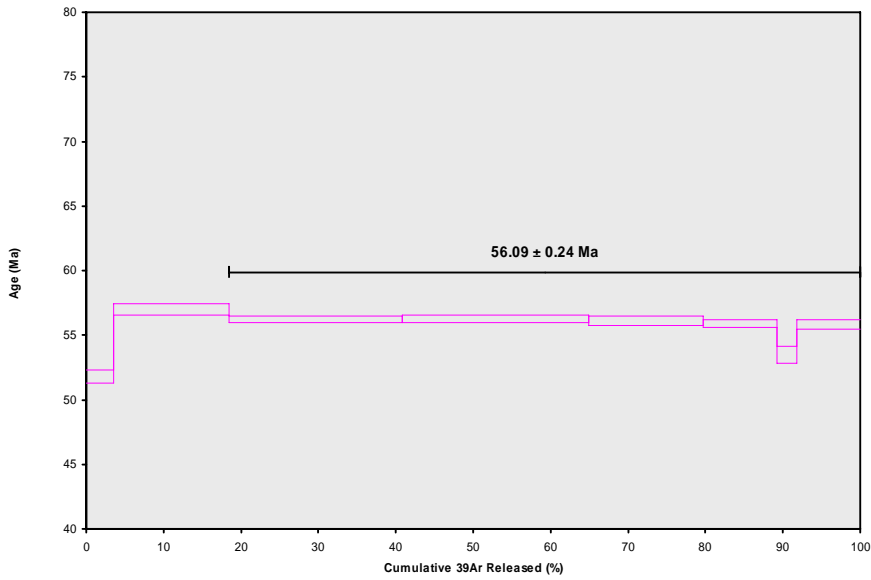

**Ar-Ages in Ma**

WEIGHTED PLATEAU  
 56.09 ± 0.24  
 TOTAL FUSION  
 56.03 ± 0.21  
 NORMAL ISOCHRON  
 56.29 ± 0.26  
 INVERSE ISOCHRON  
 56.28 ± 0.26

MSWD  
 1.49

**Sample Info**

plagioclase  
 West Greenland  
 rad

IRR = OSU1B03  
 J = 0.0017380 ± 0.0000026

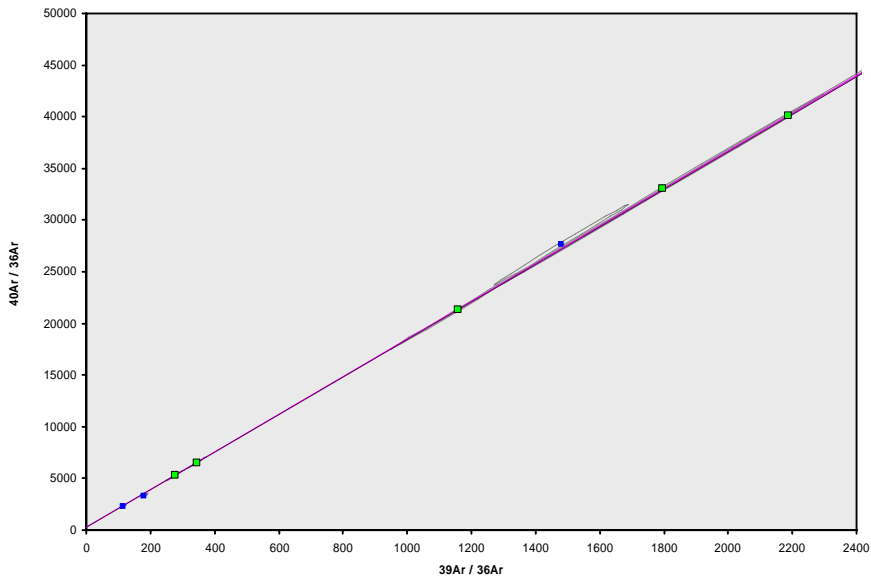

**Ar-Ages in Ma**

WEIGHTED PLATEAU  
 56.09 ± 0.24  
 TOTAL FUSION  
 56.03 ± 0.21  
 NORMAL ISOCHRON  
 56.29 ± 0.26  
 INVERSE ISOCHRON  
 56.28 ± 0.26

MSWD  
 0.10

40AR/36AR INTERCEPT  
 249.6 ± 34.4

**Sample Info**

plagioclase  
 West Greenland  
 rad

IRR = OSU1B03  
 J = 0.0017380 ± 0.0000026

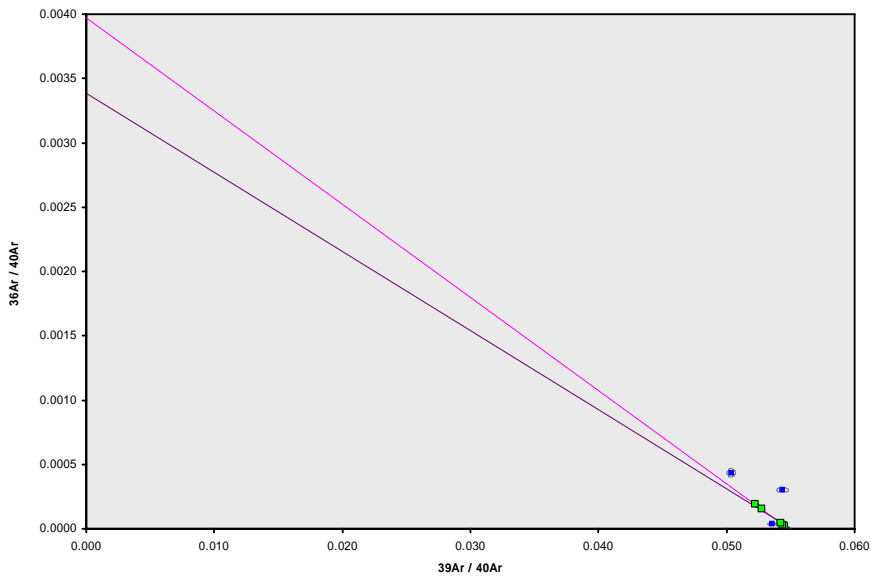

**Ar-Ages in Ma**

WEIGHTED PLATEAU  
 56.09 ± 0.24  
 TOTAL FUSION  
 56.03 ± 0.21  
 NORMAL ISOCHRON  
 56.29 ± 0.26  
 INVERSE ISOCHRON  
 56.28 ± 0.26

MSWD  
 0.09

40AR/36AR INTERCEPT  
 251.7 ± 34.5

**Sample Info**

plagioclase  
 West Greenland  
 rad

IRR = OSU1B03  
 J = 0.0017380 ± 0.0000026

08C2007.AGE >>> 464627 >>> LARSEN PROJECT

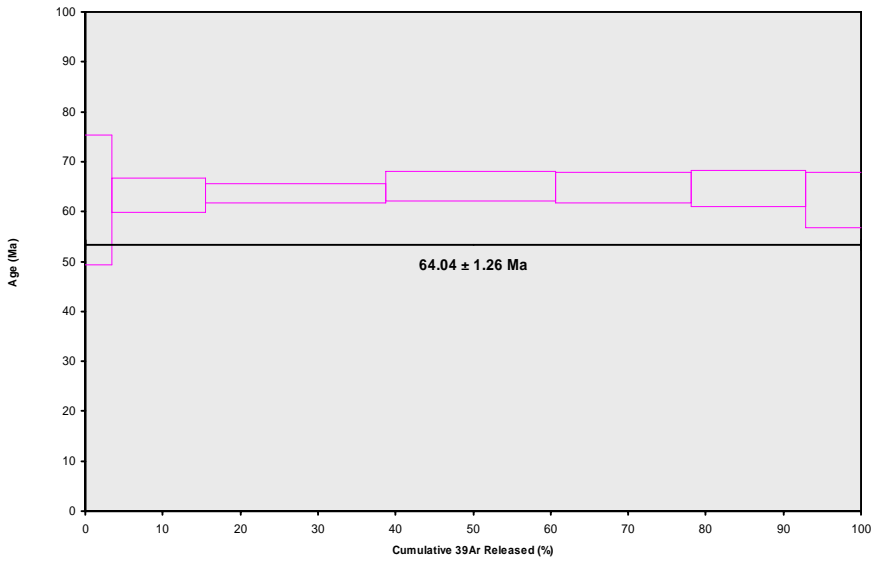

Ar-Ages in Ma

WEIGHTED PLATEAU  
 $64.04 \pm 1.26$   
 TOTAL FUSION  
 $64.14 \pm 1.38$   
 NORMAL ISOCHRON  
 $64.33 \pm 1.98$   
 INVERSE ISOCHRON  
 $64.46 \pm 1.97$

MSWD  
 0.28

Sample Info

plagioclase  
 Labrador Sea  
 jh  
 IRR = OSU1B08  
 $J = 0.0025393 \pm 0.0000084$

08C2007.AGE >>> 464627 >>> LARSEN PROJECT

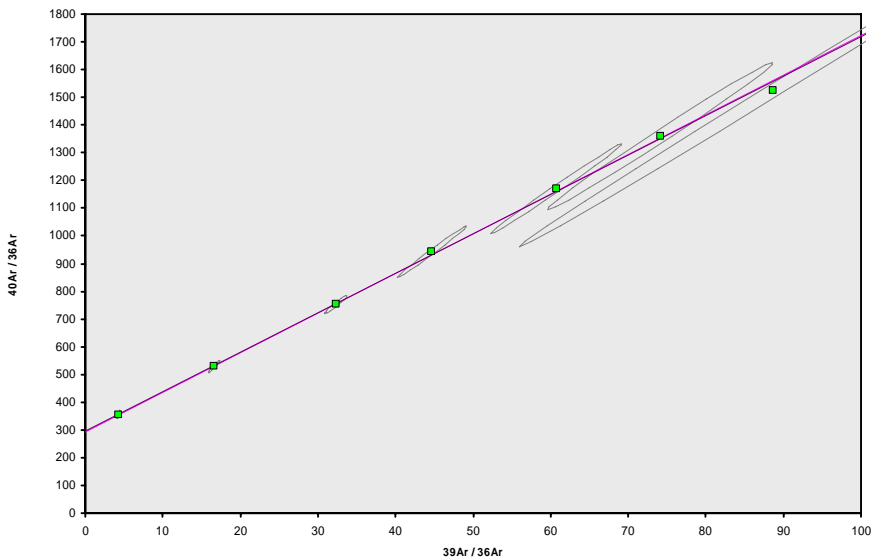

Ar-Ages in Ma

WEIGHTED PLATEAU  
 $64.04 \pm 1.26$   
 TOTAL FUSION  
 $64.14 \pm 1.38$   
 NORMAL ISOCHRON  
 $64.33 \pm 1.98$   
 INVERSE ISOCHRON  
 $64.46 \pm 1.97$

MSWD  
 0.30

40AR/36AR INTERCEPT  
 $292.8 \pm 11.5$

Sample Info

plagioclase  
 Labrador Sea  
 jh  
 IRR = OSU1B08  
 $J = 0.0025393 \pm 0.0000084$

08C2007.AGE >>> 464627 >>> LARSEN PROJECT

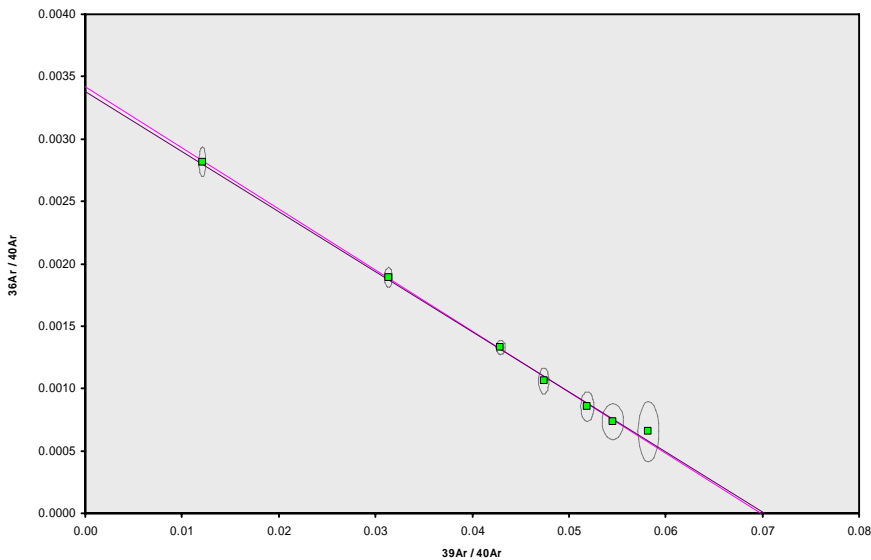

Ar-Ages in Ma

WEIGHTED PLATEAU  
 $64.04 \pm 1.26$   
 TOTAL FUSION  
 $64.14 \pm 1.38$   
 NORMAL ISOCHRON  
 $64.33 \pm 1.98$   
 INVERSE ISOCHRON  
 $64.46 \pm 1.97$

MSWD  
 0.27

40AR/36AR INTERCEPT  
 $292.3 \pm 11.5$

Sample Info

plagioclase  
 Labrador Sea  
 jh  
 IRR = OSU1B08  
 $J = 0.0025393 \pm 0.0000084$

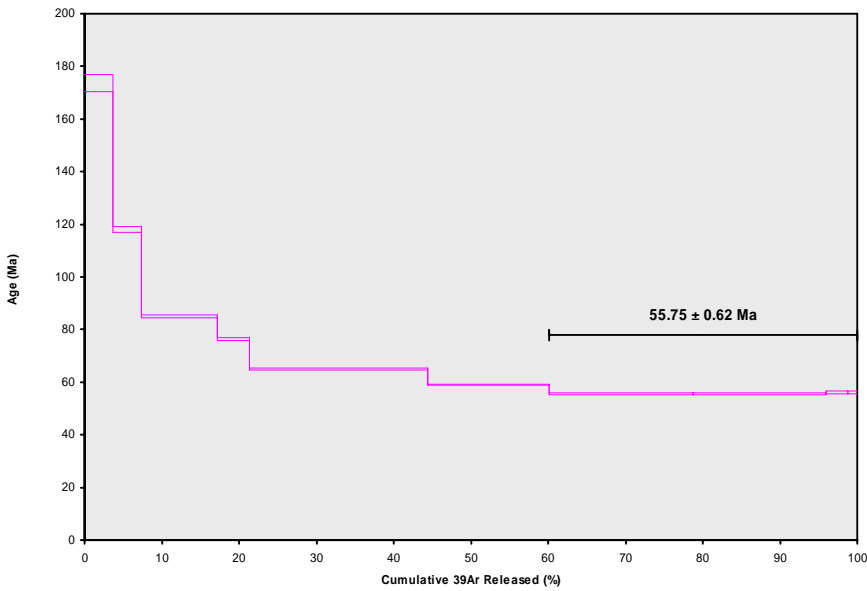

**Ar-Ages in Ma**

WEIGHTED PLATEAU  
 $55.75 \pm 0.62$   
 TOTAL FUSION  
 $68.84 \pm 0.70$   
 NORMAL ISOCHRON  
 $55.29 \pm 0.78$   
 INVERSE ISOCHRON  
 $55.29 \pm 0.77$

MSWD  
 1.94

**Sample Info**

whole rock  
 Greenland  
 jh  
 IRR = OSU4A05  
 $J = 0.0015695 \pm 0.0000077$

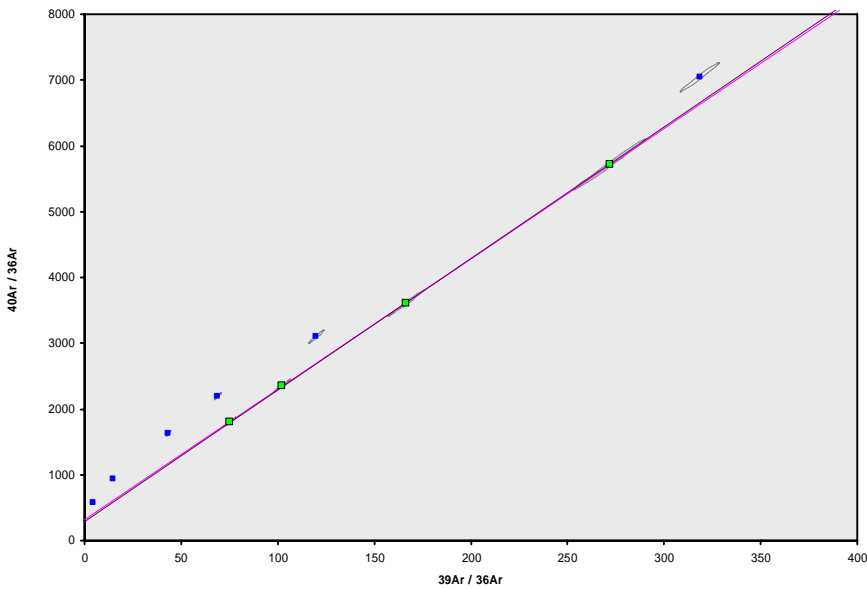

**Ar-Ages in Ma**

WEIGHTED PLATEAU  
 $55.75 \pm 0.62$   
 TOTAL FUSION  
 $68.84 \pm 0.70$   
 NORMAL ISOCHRON  
 $55.29 \pm 0.78$   
 INVERSE ISOCHRON  
 $55.29 \pm 0.77$

MSWD  
 1.09

40AR/36AR INTERCEPT  
 $317.7 \pm 25.2$

**Sample Info**

whole rock  
 Greenland  
 jh  
 IRR = OSU4A05  
 $J = 0.0015695 \pm 0.0000077$

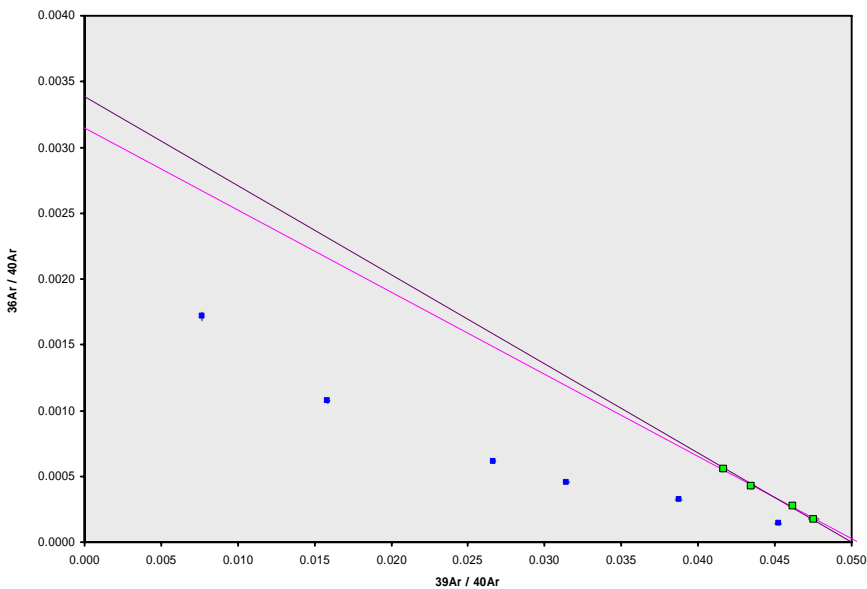

**Ar-Ages in Ma**

WEIGHTED PLATEAU  
 $55.75 \pm 0.62$   
 TOTAL FUSION  
 $68.84 \pm 0.70$   
 NORMAL ISOCHRON  
 $55.29 \pm 0.78$   
 INVERSE ISOCHRON  
 $55.29 \pm 0.77$

MSWD  
 1.08

40AR/36AR INTERCEPT  
 $317.7 \pm 25.1$

**Sample Info**

whole rock  
 Greenland  
 jh  
 IRR = OSU4A05  
 $J = 0.0015695 \pm 0.0000077$

06C10.AGE >>> KØ 17090 >>> LARSEN PROJECT

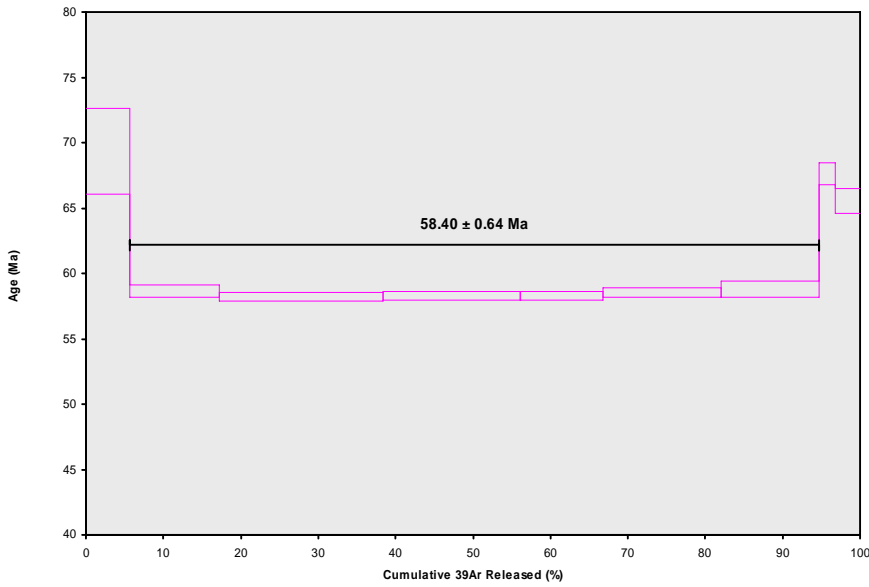

Ar-Ages in Ma

WEIGHTED PLATEAU  
58.40 ± 0.64  
TOTAL FUSION  
59.48 ± 0.68  
NORMAL ISOCRON  
58.10 ± 0.69  
INVERSE ISOCRON  
58.10 ± 0.69

MSWD  
1.06

Sample Info

plagioclase  
Greenland  
jh  
IRR = OSU4A05  
J = 0.0015475 ± 0.0000084

06C10.AGE >>> KØ 17090 >>> LARSEN PROJECT

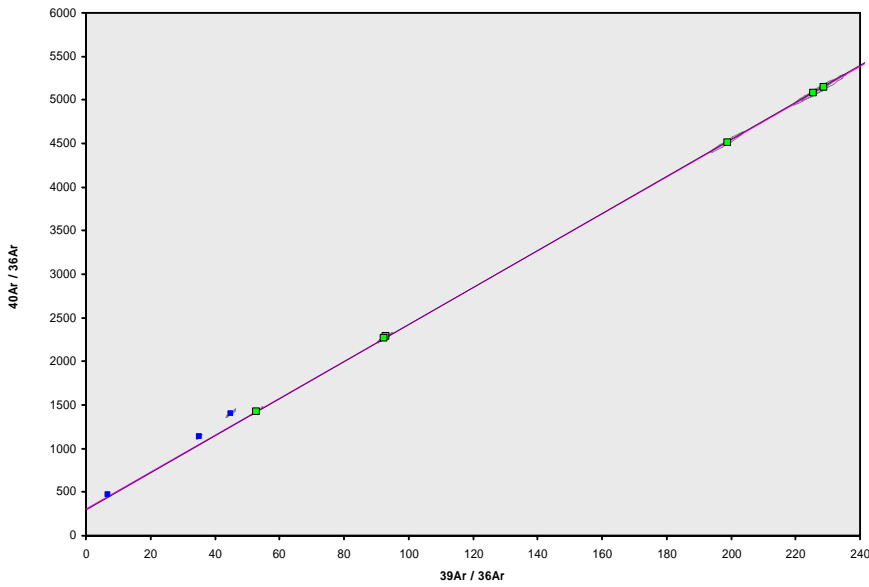

Ar-Ages in Ma

WEIGHTED PLATEAU  
58.40 ± 0.64  
TOTAL FUSION  
59.48 ± 0.68  
NORMAL ISOCRON  
58.10 ± 0.69  
INVERSE ISOCRON  
58.10 ± 0.69

MSWD  
0.13

40AR/36AR INTERCEPT  
310.5 ± 14.0

Sample Info

plagioclase  
Greenland  
jh  
IRR = OSU4A05  
J = 0.0015475 ± 0.0000084

06C10.AGE >>> KØ 17090 >>> LARSEN PROJECT

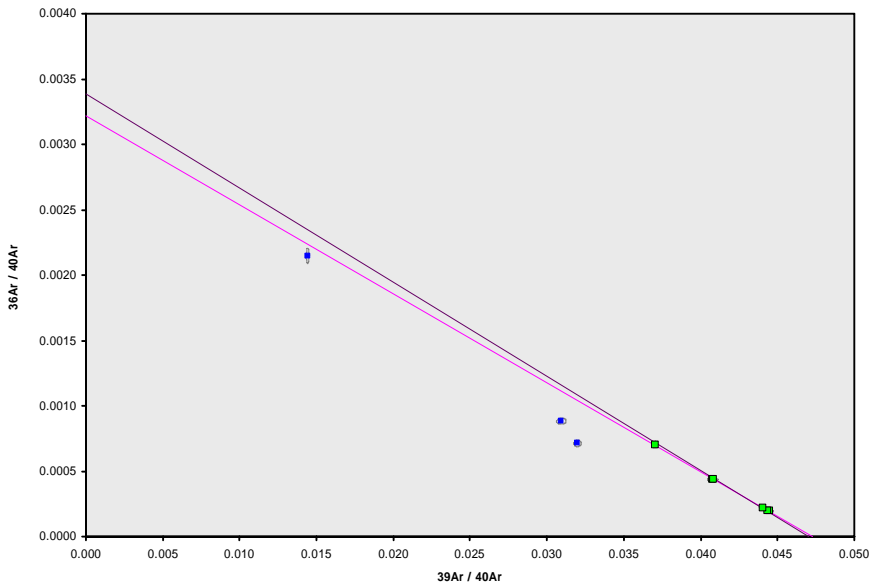

Ar-Ages in Ma

WEIGHTED PLATEAU  
58.40 ± 0.64  
TOTAL FUSION  
59.48 ± 0.68  
NORMAL ISOCRON  
58.10 ± 0.69  
INVERSE ISOCRON  
58.10 ± 0.69

MSWD  
0.13

40AR/36AR INTERCEPT  
310.6 ± 14.0

Sample Info

plagioclase  
Greenland  
jh  
IRR = OSU4A05  
J = 0.0015475 ± 0.0000084

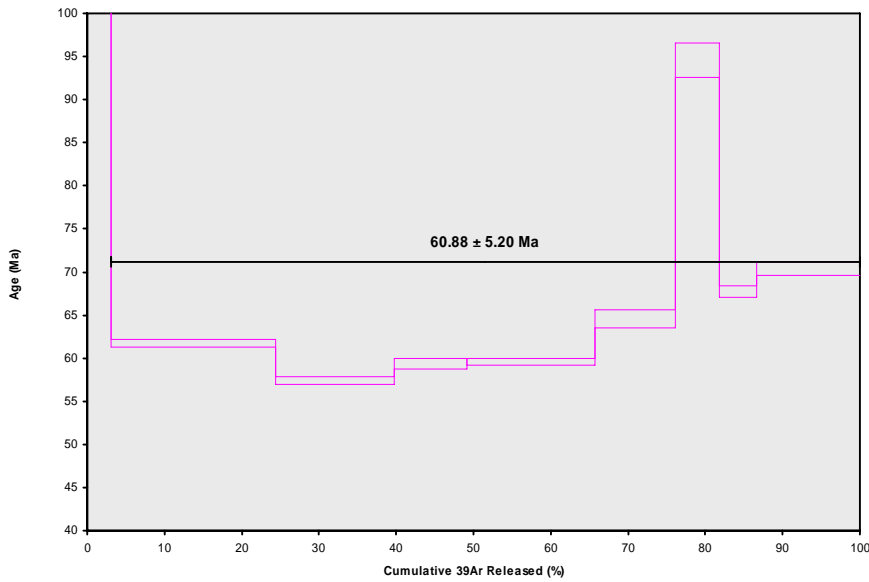

**Ar-Ages in Ma**

WEIGHTED PLATEAU  
 60.88 ± 5.20  
 TOTAL FUSION  
 74.01 ± 0.98  
 NORMAL ISOCHRON  
 51.75 ± 0.88  
 INVERSE ISOCHRON  
 51.75 ± 0.88

MSWD  
 537.92

**Sample Info**

plagioclase  
 Greenland  
 jh

IRR = OSU4A05  
 J = 0.0015263 ± 0.0000090

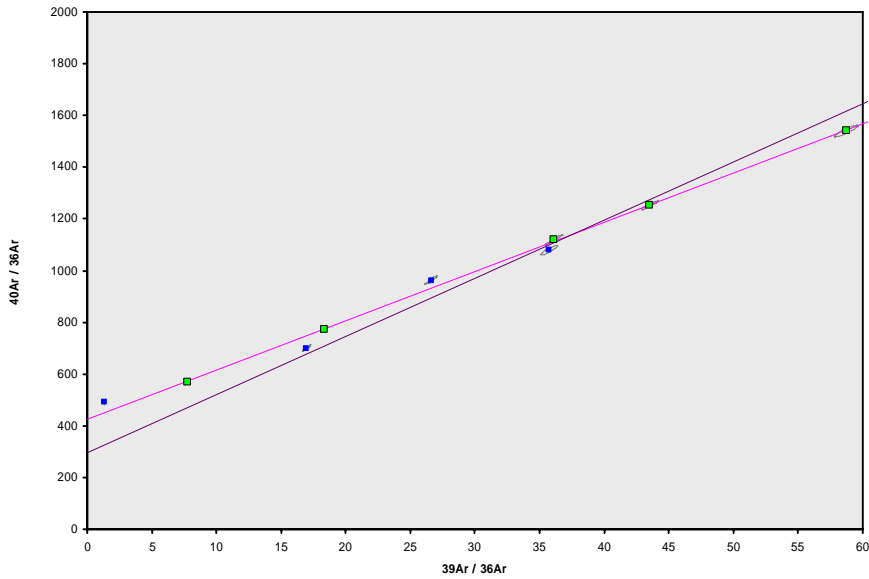

**Ar-Ages in Ma**

WEIGHTED PLATEAU  
 60.88 ± 5.20  
 TOTAL FUSION  
 74.01 ± 0.98  
 NORMAL ISOCHRON  
 51.75 ± 0.88  
 INVERSE ISOCHRON  
 51.75 ± 0.88

MSWD  
 1.36

40AR/36AR INTERCEPT  
 423.9 ± 8.3

**Sample Info**

plagioclase  
 Greenland  
 jh

IRR = OSU4A05  
 J = 0.0015263 ± 0.0000090

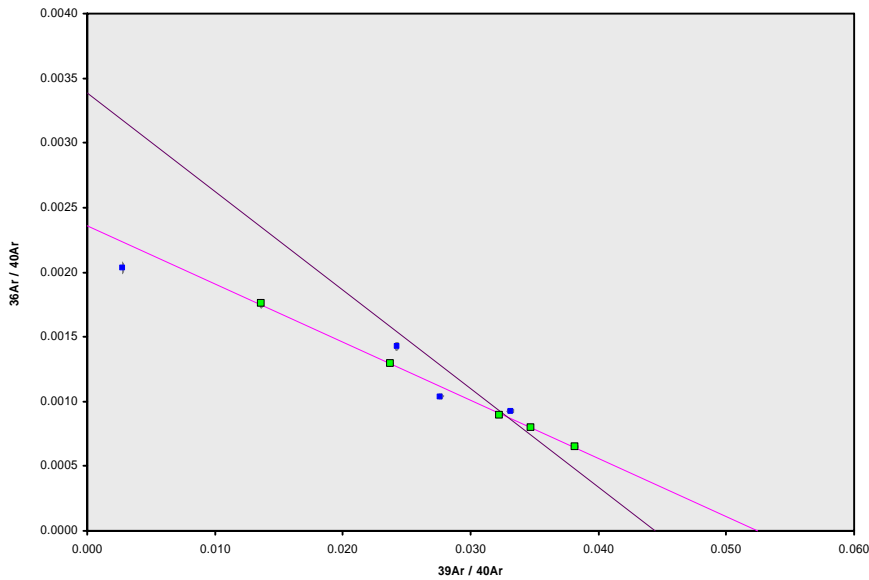

**Ar-Ages in Ma**

WEIGHTED PLATEAU  
 60.88 ± 5.20  
 TOTAL FUSION  
 74.01 ± 0.98  
 NORMAL ISOCHRON  
 51.75 ± 0.88  
 INVERSE ISOCHRON  
 51.75 ± 0.88

MSWD  
 1.38

40AR/36AR INTERCEPT  
 423.9 ± 8.4

**Sample Info**

plagioclase  
 Greenland  
 jh

IRR = OSU4A05  
 J = 0.0015263 ± 0.0000090

05C3299.AGE >>> 120403 >>> LARSEN PROJECT

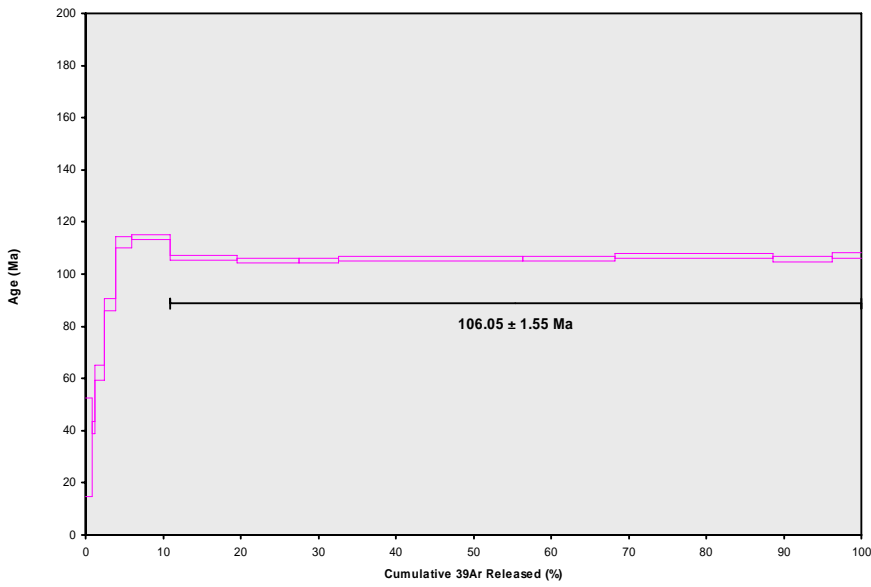

Ar-Ages in Ma

WEIGHTED PLATEAU  
106.05 ± 1.55  
TOTAL FUSION  
105.09 ± 1.52  
NORMAL ISOCHRON  
104.15 ± 2.96  
INVERSE ISOCHRON  
104.17 ± 2.95

MSWD  
1.84

Sample Info

whole rock  
Greenland  
jh

IRR = OSU5D05  
J = 0.0015443 ± 0.0000111

05C3299.AGE >>> 120403 >>> LARSEN PROJECT

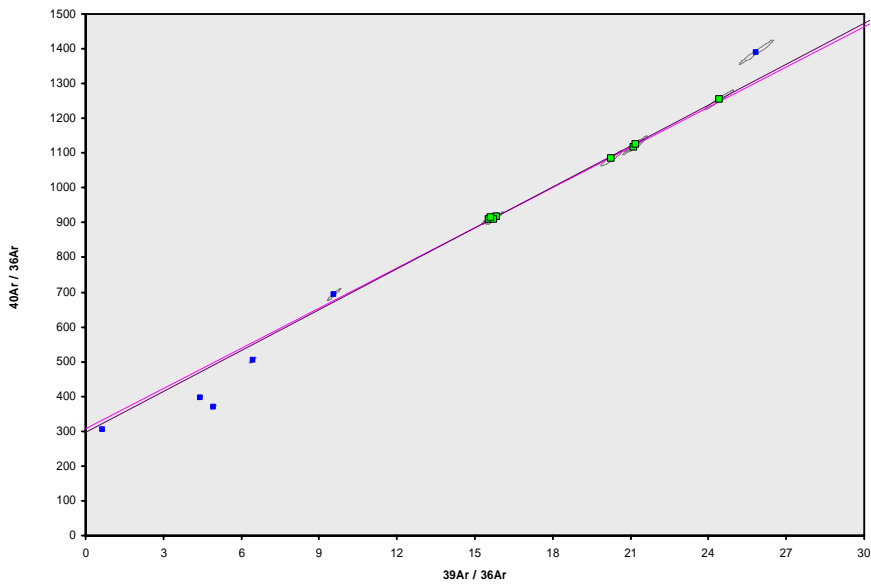

Ar-Ages in Ma

WEIGHTED PLATEAU  
106.05 ± 1.55  
TOTAL FUSION  
105.09 ± 1.52  
NORMAL ISOCHRON  
104.15 ± 2.96  
INVERSE ISOCHRON  
104.17 ± 2.95

MSWD  
1.55

40AR/36AR INTERCEPT  
308.8 ± 17.8

Sample Info

whole rock  
Greenland  
jh

IRR = OSU5D05  
J = 0.0015443 ± 0.0000111

05C3299.AGE >>> 120403 >>> LARSEN PROJECT

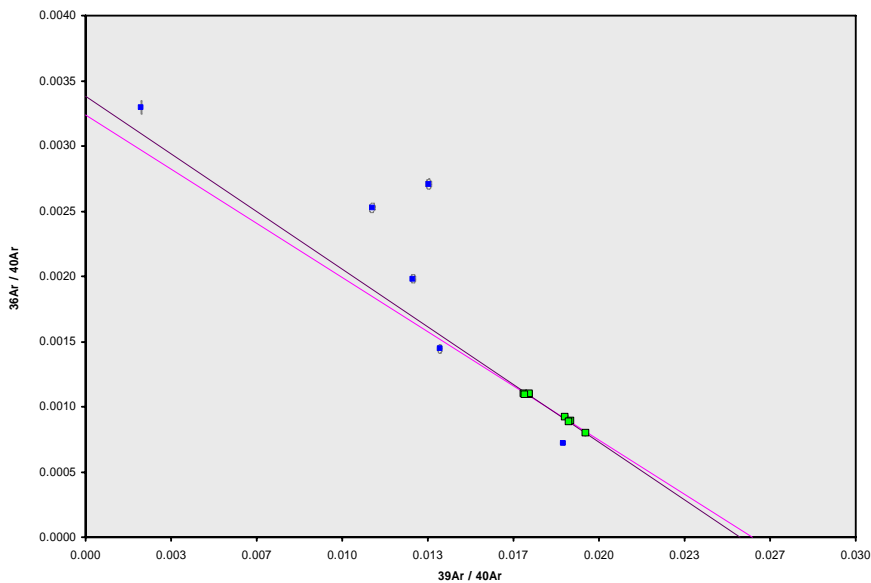

Ar-Ages in Ma

WEIGHTED PLATEAU  
106.05 ± 1.55  
TOTAL FUSION  
105.09 ± 1.52  
NORMAL ISOCHRON  
104.15 ± 2.96  
INVERSE ISOCHRON  
104.17 ± 2.95

MSWD  
1.55

40AR/36AR INTERCEPT  
308.8 ± 17.8

Sample Info

whole rock  
Greenland  
jh

IRR = OSU5D05  
J = 0.0015443 ± 0.0000111



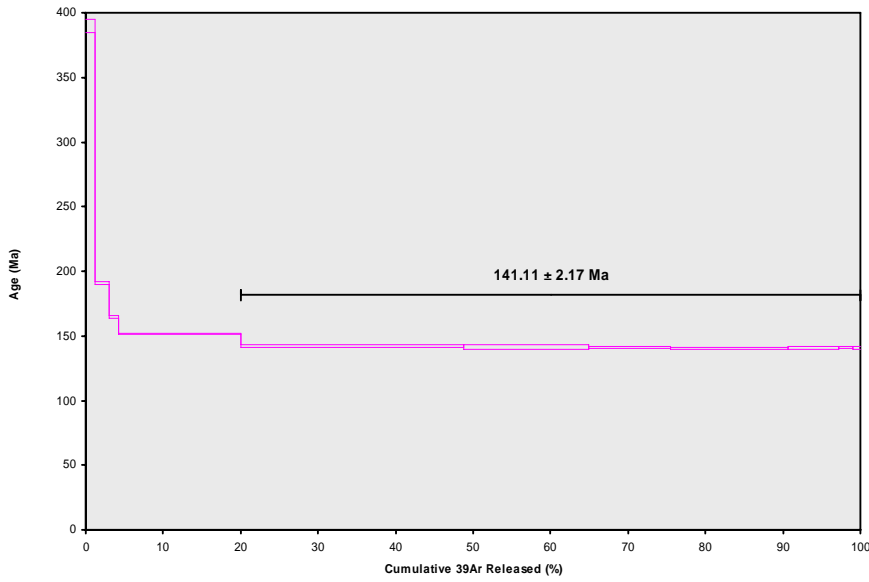

Ar-Ages in Ma

WEIGHTED PLATEAU  
 141.11 ± 2.17  
 TOTAL FUSION  
 147.42 ± 2.27  
 NORMAL ISOCHRON  
 141.33 ± 2.25  
 INVERSE ISOCHRON  
 141.20 ± 2.24

MSWD  
 1.42

Sample Info

whole rock  
 Greenland  
 jh

IRR = OSU5D05  
 J = 0.0015265 ± 0.0000119

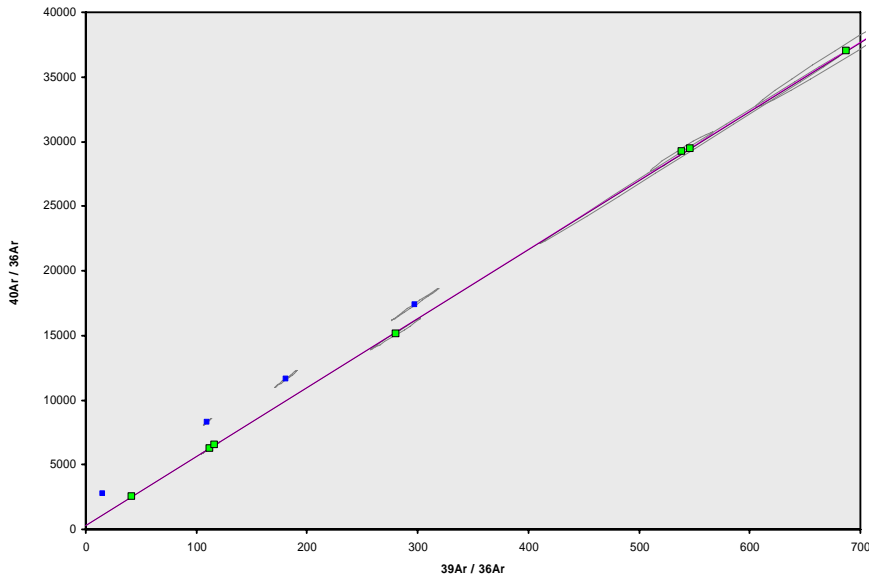

Ar-Ages in Ma

WEIGHTED PLATEAU  
 141.11 ± 2.17  
 TOTAL FUSION  
 147.42 ± 2.27  
 NORMAL ISOCHRON  
 141.33 ± 2.25  
 INVERSE ISOCHRON  
 141.20 ± 2.24

MSWD  
 1.76

40AR/36AR INTERCEPT  
 287.2 ± 28.8

Sample Info

whole rock  
 Greenland  
 jh

IRR = OSU5D05  
 J = 0.0015265 ± 0.0000119

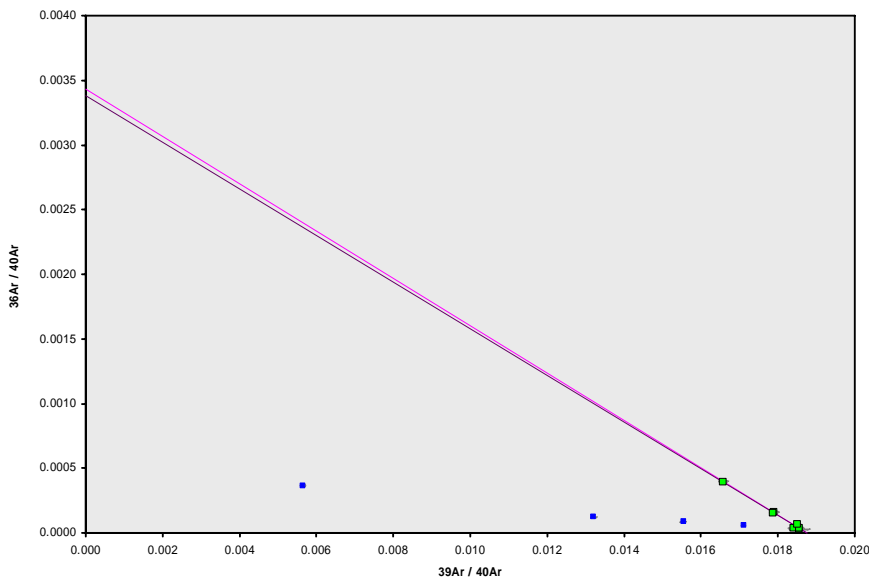

Ar-Ages in Ma

WEIGHTED PLATEAU  
 141.11 ± 2.17  
 TOTAL FUSION  
 147.42 ± 2.27  
 NORMAL ISOCHRON  
 141.33 ± 2.25  
 INVERSE ISOCHRON  
 141.20 ± 2.24

MSWD  
 1.68

40AR/36AR INTERCEPT  
 291.2 ± 28.0

Sample Info

whole rock  
 Greenland  
 jh

IRR = OSU5D05  
 J = 0.0015265 ± 0.0000119

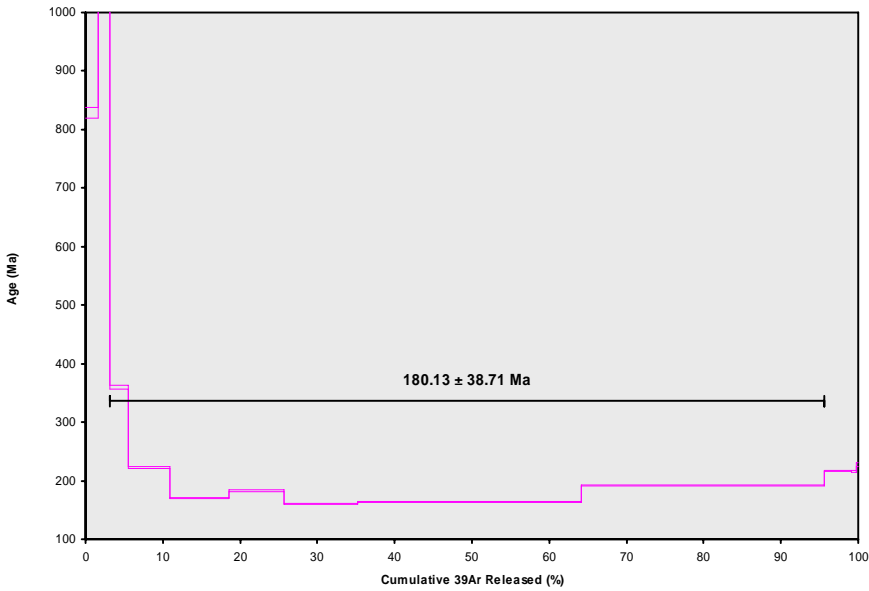

**Ar-Ages in Ma**

WEIGHTED PLATEAU  
 $180.13 \pm 38.71$   
 TOTAL FUSION  
 $213.63 \pm 2.72$   
 NORMAL ISOCHRON  
 $115.46 \pm 4.70$   
 INVERSE ISOCHRON  
 $115.43 \pm 4.72$

MSWD  
 5302.37

**Sample Info**

whole rock  
 Greenland  
 jh

IRR = OSU5D05  
 $J = 0.0015762 \pm 0.0000104$

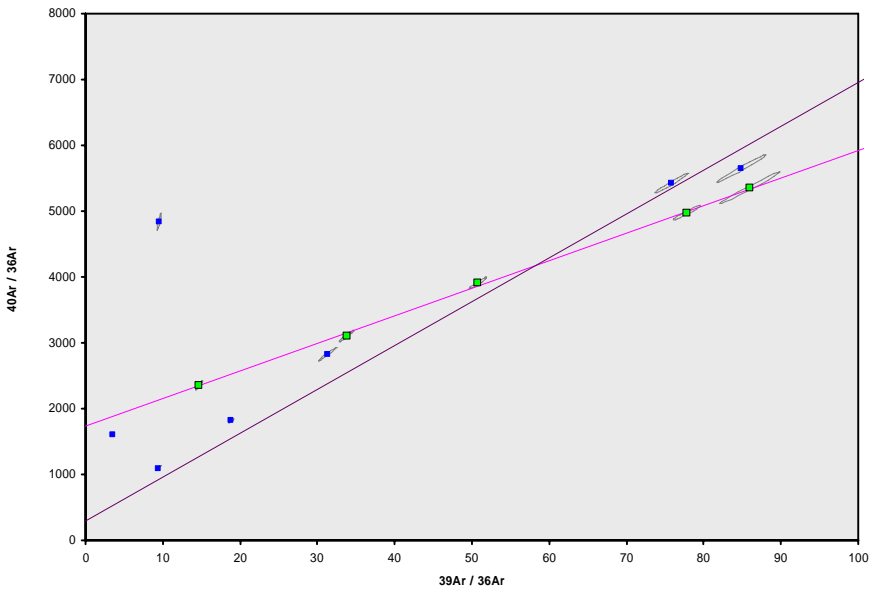

**Ar-Ages in Ma**

WEIGHTED PLATEAU  
 $180.13 \pm 38.71$   
 TOTAL FUSION  
 $213.63 \pm 2.72$   
 NORMAL ISOCHRON  
 $115.46 \pm 4.70$   
 INVERSE ISOCHRON  
 $115.43 \pm 4.72$

MSWD  
 3.44

40AR/36AR INTERCEPT  
 $1733.8 \pm 93.3$

**Sample Info**

whole rock  
 Greenland  
 jh

IRR = OSU5D05  
 $J = 0.0015762 \pm 0.0000104$

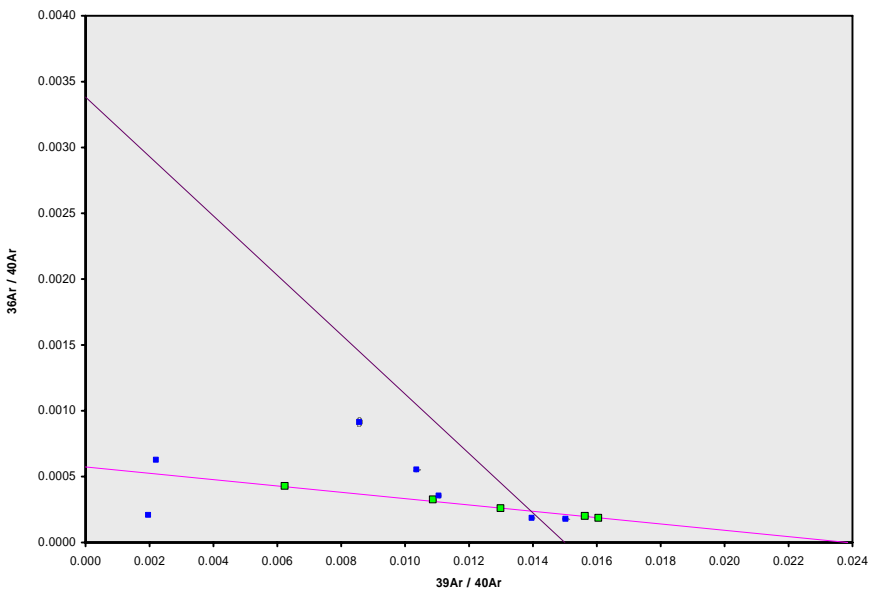

**Ar-Ages in Ma**

WEIGHTED PLATEAU  
 $180.13 \pm 38.71$   
 TOTAL FUSION  
 $213.63 \pm 2.72$   
 NORMAL ISOCHRON  
 $115.46 \pm 4.70$   
 INVERSE ISOCHRON  
 $115.43 \pm 4.72$

MSWD  
 3.44

40AR/36AR INTERCEPT  
 $1736.3 \pm 93.9$

**Sample Info**

whole rock  
 Greenland  
 jh

IRR = OSU5D05  
 $J = 0.0015762 \pm 0.0000104$
